# Supplementary material
Source: Springer Nature journal article supplement (https://www.springermedizin.de/resource/supplementary/13002_2010_196_MOESM4_ESM.pdf/9627360)

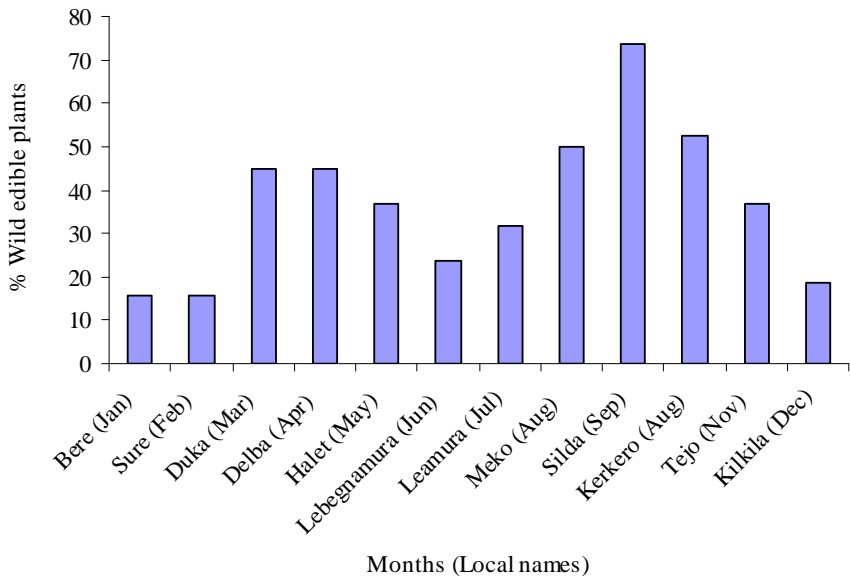

Supplement: MOESM4 [file 9627360]
